# Supplementary material for: Comparison of Criteria for Choosing the Number of Classes in Bayesian Finite Mixture Models
Source: PubMed Central journal article supplement (PMC5231325; doi:10.1371/journal.pone.0168838), 2017-01-12
Supplement: pone.0168838.s001.pdf [file pone.0168838.s001.pdf]

| $\alpha$    | Cut-off                           | $k = 1$ | $k = 2$ | $k = 3$ | $k = 4$ | $k = 5$ | $k = 6$ |
|-------------|-----------------------------------|---------|---------|---------|---------|---------|---------|
| 0.00001     | R&M <sub>0</sub> <sup>NI</sup>    | 100%(1) | 100%(2) | 95%(3)  | 70%(4)  | 40%(4)  | 10%(4)  |
|             | R&M <sub>0.01</sub> <sup>NI</sup> | 100%(1) | 100%(2) | 95%(3)  | 70%(4)  | 40%(4)  | 10%(4)  |
|             | R&M <sub>0.02</sub> <sup>NI</sup> | 100%(1) | 100%(2) | 95%(3)  | 70%(4)  | 40%(4)  | 10%(4)  |
|             | R&M <sub>0.05</sub> <sup>NI</sup> | 100%(1) | 100%(2) | 95%(3)  | 70%(4)  | 40%(4)  | 10%(4)  |
| 0.001       | R&M <sub>0</sub> <sup>NI</sup>    | 100%(1) | 100%(2) | 95%(3)  | 70%(4)  | 30%(4)  | 0%(4)   |
|             | R&M <sub>0.01</sub> <sup>NI</sup> | 100%(1) | 100%(2) | 95%(3)  | 70%(4)  | 30%(4)  | 0%(4)   |
|             | R&M <sub>0.02</sub> <sup>NI</sup> | 100%(1) | 100%(2) | 95%(3)  | 70%(4)  | 30%(4)  | 0%(4)   |
|             | R&M <sub>0.05</sub> <sup>NI</sup> | 100%(1) | 100%(2) | 95%(3)  | 70%(4)  | 30%(4)  | 0%(4)   |
| 0.01        | R&M <sub>0</sub> <sup>NI</sup>    | 100%(1) | 100%(2) | 95%(3)  | 75%(4)  | 55%(5)  | 5%(4)   |
|             | R&M <sub>0.01</sub> <sup>NI</sup> | 100%(1) | 100%(2) | 95%(3)  | 75%(4)  | 55%(5)  | 5%(4)   |
|             | R&M <sub>0.02</sub> <sup>NI</sup> | 100%(1) | 100%(2) | 95%(3)  | 75%(4)  | 55%(5)  | 5%(4)   |
|             | R&M <sub>0.05</sub> <sup>NI</sup> | 100%(1) | 100%(2) | 95%(3)  | 75%(4)  | 55%(5)  | 5%(4)   |
| 0.05        | R&M <sub>0</sub> <sup>NI</sup>    | 100%(1) | 100%(2) | 100%(3) | 75%(4)  | 60%(5)  | 35%(5)  |
|             | R&M <sub>0.01</sub> <sup>NI</sup> | 100%(1) | 100%(2) | 100%(3) | 75%(4)  | 60%(5)  | 35%(5)  |
|             | R&M <sub>0.02</sub> <sup>NI</sup> | 100%(1) | 100%(2) | 100%(3) | 75%(4)  | 60%(5)  | 35%(5)  |
|             | R&M <sub>0.05</sub> <sup>NI</sup> | 100%(1) | 100%(2) | 100%(3) | 75%(4)  | 60%(5)  | 35%(5)  |
| 0.1         | R&M <sub>0</sub> <sup>NI</sup>    | 100%(1) | 100%(2) | 100%(3) | 80%(4)  | 80%(5)  | 55%(6)  |
|             | R&M <sub>0.01</sub> <sup>NI</sup> | 100%(1) | 100%(2) | 100%(3) | 80%(4)  | 80%(5)  | 50%(6)  |
|             | R&M <sub>0.02</sub> <sup>NI</sup> | 100%(1) | 100%(2) | 100%(3) | 80%(4)  | 80%(5)  | 50%(6)  |
|             | R&M <sub>0.05</sub> <sup>NI</sup> | 100%(1) | 100%(2) | 100%(3) | 80%(4)  | 80%(5)  | 45%(5)  |
| 0.3         | R&M <sub>0</sub> <sup>NI</sup>    | 100%(1) | 100%(2) | 100%(3) | 100%(4) | 100%(5) | 95%(6)  |
|             | R&M <sub>0.01</sub> <sup>NI</sup> | 100%(1) | 100%(2) | 100%(3) | 100%(4) | 100%(5) | 90%(6)  |
|             | R&M <sub>0.02</sub> <sup>NI</sup> | 100%(1) | 100%(2) | 100%(3) | 100%(4) | 100%(5) | 90%(6)  |
|             | R&M <sub>0.05</sub> <sup>NI</sup> | 100%(1) | 100%(2) | 100%(3) | 100%(4) | 100%(5) | 90%(6)  |
| 0.5         | R&M <sub>0</sub> <sup>NI</sup>    | 100%(1) | 100%(2) | 100%(3) | 100%(4) | 100%(5) | 85%(6)  |
|             | R&M <sub>0.01</sub> <sup>NI</sup> | 100%(1) | 100%(2) | 100%(3) | 100%(4) | 100%(5) | 100%(6) |
|             | R&M <sub>0.02</sub> <sup>NI</sup> | 100%(1) | 100%(2) | 100%(3) | 100%(4) | 100%(5) | 100%(6) |
|             | R&M <sub>0.05</sub> <sup>NI</sup> | 100%(1) | 100%(2) | 100%(3) | 100%(4) | 100%(5) | 100%(6) |
| 0.9         | R&M <sub>0</sub> <sup>NI</sup>    | 95%(1)  | 95%(2)  | 45%(3)  | 0%(5)   | 0%(6)   | 0%(7)   |
|             | R&M <sub>0.01</sub> <sup>NI</sup> | 100%(1) | 100%(2) | 100%(3) | 70%(4)  | 25%(6)  | 10%(7)  |
|             | R&M <sub>0.02</sub> <sup>NI</sup> | 100%(1) | 100%(2) | 100%(3) | 85%(4)  | 60%(5)  | 30%(7)  |
|             | R&M <sub>0.05</sub> <sup>NI</sup> | 100%(1) | 100%(2) | 100%(3) | 100%(4) | 95%(5)  | 90%(6)  |
| frequentist | BIC                               | 100%(1) | 100%(2) | 100%(3) | 65%(4)  | 45%(5)  | 15%(7)  |
