# Supplementary material for: Comparison of Criteria for Choosing the Number of Classes in Bayesian Finite Mixture Models
Source: PubMed Central journal article supplement (PMC5231325; doi:10.1371/journal.pone.0168838), 2017-01-12
Supplement: pone.0168838.s002.pdf [file pone.0168838.s002.pdf]

| $\alpha$    | Cut-off                           | $k = 1$ | $k = 2$ | $k = 3$ | $k = 4$ | $k = 5$ | $k = 6$ |
|-------------|-----------------------------------|---------|---------|---------|---------|---------|---------|
| 0.00001     | R&M <sub>0</sub> <sup>NG</sup>    | 100%(1) | 100%(2) | 100%(3) | 100%(4) | 100%(5) | 70%(6)  |
|             | R&M <sub>0.01</sub> <sup>NG</sup> | 100%(1) | 100%(2) | 100%(3) | 100%(4) | 100%(5) | 70%(6)  |
|             | R&M <sub>0.02</sub> <sup>NG</sup> | 100%(1) | 100%(2) | 100%(3) | 100%(4) | 100%(5) | 70%(6)  |
|             | R&M <sub>0.05</sub> <sup>NG</sup> | 100%(1) | 100%(2) | 100%(3) | 100%(4) | 100%(5) | 70%(6)  |
| 0.001       | R&M <sub>0</sub> <sup>NG</sup>    | 100%(1) | 100%(2) | 100%(3) | 100%(4) | 100%(5) | 100%(6) |
|             | R&M <sub>0.01</sub> <sup>NG</sup> | 100%(1) | 100%(2) | 100%(3) | 100%(4) | 100%(5) | 100%(6) |
|             | R&M <sub>0.02</sub> <sup>NG</sup> | 100%(1) | 100%(2) | 100%(3) | 100%(4) | 100%(5) | 100%(6) |
|             | R&M <sub>0.05</sub> <sup>NG</sup> | 100%(1) | 100%(2) | 100%(3) | 100%(4) | 100%(5) | 100%(6) |
| 0.01        | R&M <sub>0</sub> <sup>NG</sup>    | 95%(1)  | 100%(2) | 100%(3) | 100%(4) | 100%(5) | 100%(6) |
|             | R&M <sub>0.01</sub> <sup>NG</sup> | 100%(1) | 100%(2) | 100%(3) | 100%(4) | 100%(5) | 100%(6) |
|             | R&M <sub>0.02</sub> <sup>NG</sup> | 100%(1) | 100%(2) | 100%(3) | 100%(4) | 100%(5) | 100%(6) |
|             | R&M <sub>0.05</sub> <sup>NG</sup> | 100%(1) | 100%(2) | 100%(3) | 100%(4) | 100%(5) | 100%(6) |
| 0.05        | R&M <sub>0</sub> <sup>NG</sup>    | 30%(2)  | 5%(3)   | 0%(3)   | 5%(5)   | 40%(6)  | 80%(6)  |
|             | R&M <sub>0.01</sub> <sup>NG</sup> | 55%(1)  | 85%(2)  | 95%(3)  | 100%(4) | 95%(5)  | 100%(6) |
|             | R&M <sub>0.02</sub> <sup>NG</sup> | 60%(1)  | 95%(2)  | 100%(3) | 100%(4) | 95%(5)  | 100%(6) |
|             | R&M <sub>0.05</sub> <sup>NG</sup> | 80%(1)  | 95%(2)  | 100%(3) | 100%(4) | 100%(5) | 100%(6) |
| 0.1         | R&M <sub>0</sub> <sup>NG</sup>    | 0%(3)   | 0%(4)   | 0%(5)   | 0%(6)   | 0%(6)   | 0%(7)   |
|             | R&M <sub>0.01</sub> <sup>NG</sup> | 0%(3)   | 0%(3)   | 0%(4)   | 0%(5)   | 15%(6)  | 80%(6)  |
|             | R&M <sub>0.02</sub> <sup>NG</sup> | 0%(2)   | 0%(3)   | 10%(4)  | 20%(5)  | 70%(5)  | 100%(6) |
|             | R&M <sub>0.05</sub> <sup>NG</sup> | 10%(2)  | 45%(3)  | 80%(3)  | 100%(4) | 100%(5) | 100%(6) |
| 0.3         | R&M <sub>0</sub> <sup>NG</sup>    | 0%(7)   | 0%(7)   | 0%(8)   | 0%(8)   | 0%(9)   | 0%(9)   |
|             | R&M <sub>0.01</sub> <sup>NG</sup> | 0%(6)   | 0%(6)   | 0%(6)   | 0%(7)   | 0%(7)   | 0%(8)   |
|             | R&M <sub>0.02</sub> <sup>NG</sup> | 0%(5)   | 0%(5)   | 0%(6)   | 0%(6)   | 0%(7)   | 0%(7)   |
|             | R&M <sub>0.05</sub> <sup>NG</sup> | 0%(4)   | 0%(4)   | 0%(4)   | 0%(5)   | 0%(6)   | 75%(6)  |
| 0.5         | R&M <sub>0</sub> <sup>NG</sup>    | 0%(8)   | 0%(9)   | 0%(9)   | 0%(9)   | 0%(10)  | 0%(10)  |
|             | R&M <sub>0.01</sub> <sup>NG</sup> | 0%(7)   | 0%(7)   | 0%(7)   | 0%(8)   | 0%(8)   | 0%(9)   |
|             | R&M <sub>0.02</sub> <sup>NG</sup> | 0%(6)   | 0%(6)   | 0%(7)   | 0%(7)   | 0%(8)   | 0%(8)   |
|             | R&M <sub>0.05</sub> <sup>NG</sup> | 0%(5)   | 0%(5)   | 0%(5)   | 0%(6)   | 0%(6)   | 5%(7)   |
| 0.9         | R&M <sub>0</sub> <sup>NG</sup>    | 0%(9)   | 0%(10)  | 0%(10)  | 0%(10)  | 0%(10)  | 0%(10)  |
|             | R&M <sub>0.01</sub> <sup>NG</sup> | 0%(8)   | 0%(9)   | 0%(9)   | 0%(9)   | 0%(9)   | 0%(9)   |
|             | R&M <sub>0.02</sub> <sup>NG</sup> | 0%(8)   | 0%(8)   | 0%(8)   | 0%(8)   | 0%(8)   | 0%(9)   |
|             | R&M <sub>0.05</sub> <sup>NG</sup> | 0%(6)   | 0%(6)   | 0%(6)   | 0%(6)   | 0%(7)   | 0%(7)   |
| frequentist | BIC                               | 100%(1) | 100%(2) | 100%(3) | 65%(4)  | 45%(5)  | 15%(7)  |
