# Supplementary material for: Comparison of Criteria for Choosing the Number of Classes in Bayesian Finite Mixture Models
Source: PubMed Central journal article supplement (PMC5231325; doi:10.1371/journal.pone.0168838), 2017-01-12
Supplement: pone.0168838.s003.pdf [file pone.0168838.s003.pdf]

---

| Sample size | $\alpha$ | R&M <sub>0</sub> <sup>NI</sup> | R&M <sub>0.01</sub> <sup>NI</sup> | R&M <sub>0.02</sub> <sup>NI</sup> | R&M <sub>0.05</sub> <sup>NI</sup> |
|-------------|----------|--------------------------------|-----------------------------------|-----------------------------------|-----------------------------------|
| #n=100      | 0.00001  | 0%(1)                          | 0%(1)                             | 0%(1)                             | 0%(1)                             |
|             | 0.001    | 0%(1)                          | 0%(1)                             | 0%(1)                             | 0%(1)                             |
|             | 0.01     | 4%(1)                          | 4%(1)                             | 4%(1)                             | 4%(1)                             |
|             | 0.05     | 14%(2)                         | 14%(2)                            | 14%(2)                            | 14%(2)                            |
|             | 0.1      | 16%(2)                         | 16%(2)                            | 16%(2)                            | 16%(2)                            |
|             | 0.3      | 22%(2)                         | 22%(2)                            | 22%(2)                            | 22%(2)                            |
|             | 0.5      | 44%(2)                         | 34%(2)                            | 32%(2)                            | 28%(2)                            |
|             | 0.9      | 96%(3)                         | 92%(3)                            | 84%(3)                            | 76%(3)                            |
| #n=1000     | 0.00001  | 100%(3)                        | 100%(3)                           | 100%(3)                           | 100%(3)                           |
|             | 0.001    | 100%(3)                        | 100%(3)                           | 100%(3)                           | 100%(3)                           |
|             | 0.01     | 100%(3)                        | 100%(3)                           | 100%(3)                           | 100%(3)                           |
|             | 0.05     | 100%(3)                        | 100%(3)                           | 100%(3)                           | 100%(3)                           |
|             | 0.1      | 100%(3)                        | 100%(3)                           | 100%(3)                           | 100%(3)                           |
|             | 0.3      | 100%(3)                        | 100%(3)                           | 100%(3)                           | 100%(3)                           |
|             | 0.5      | 98%(3)                         | 100%(3)                           | 100%(3)                           | 100%(3)                           |
|             | 0.9      | 2%(4)                          | 60%(3)                            | 72%(3)                            | 88%(3)                            |

---
