# Supplementary material for: Comparison of Criteria for Choosing the Number of Classes in Bayesian Finite Mixture Models
Source: PubMed Central journal article supplement (PMC5231325; doi:10.1371/journal.pone.0168838), 2017-01-12
Supplement: pone.0168838.s004.pdf [file pone.0168838.s004.pdf]

---

| $\alpha$ | R&M <sub>0</sub> <sup>NI</sup> | R&M <sub>0.01</sub> <sup>NI</sup> | R&M <sub>0.02</sub> <sup>NI</sup> | R&M <sub>0.05</sub> <sup>NI</sup> |
|----------|--------------------------------|-----------------------------------|-----------------------------------|-----------------------------------|
| 0.00001  | 0%(2)                          | 0%(2)                             | 0%(2)                             | 100%(1)                           |
| 0.001    | 0%(2)                          | 0%(2)                             | 0%(2)                             | 100%(1)                           |
| 0.01     | 0%(2)                          | 0%(2)                             | 0%(2)                             | 100%(1)                           |
| 0.05     | 0%(2)                          | 0%(2)                             | 0%(2)                             | 100%(1)                           |
| 0.1      | 0%(2)                          | 0%(2)                             | 0%(2)                             | 100%(1)                           |
| 0.3      | 0%(2)                          | 0%(2)                             | 10%(2)                            | 100%(1)                           |
| 0.5      | 0%(3)                          | 0%(2)                             | 50%(1)                            | 100%(1)                           |
| 0.9      | 0%(3)                          | 0%(2)                             | 60%(1)                            | 100%(1)                           |

---
