# Supplementary material for: Comparison of Criteria for Choosing the Number of Classes in Bayesian Finite Mixture Models
Source: PubMed Central journal article supplement (PMC5231325; doi:10.1371/journal.pone.0168838), 2017-01-12
Supplement: pone.0168838.s006.pdf [file pone.0168838.s006.pdf]

---

| $\alpha$ | R&M <sub>0</sub> <sup>NI</sup> | R&M <sub>0.01</sub> <sup>NI</sup> | R&M <sub>0.02</sub> <sup>NI</sup> | R&M <sub>0.05</sub> <sup>NI</sup> |
|----------|--------------------------------|-----------------------------------|-----------------------------------|-----------------------------------|
| 0.00001  | 20%(2)                         | 20%(2)                            | 20%(2)                            | 20%(2)                            |
| 0.001    | 26%(2)                         | 26%(2)                            | 26%(2)                            | 26%(2)                            |
| 0.01     | 30%(2)                         | 30%(2)                            | 30%(2)                            | 30%(2)                            |
| 0.05     | 32%(2)                         | 32%(2)                            | 32%(2)                            | 32%(2)                            |
| 0.1      | 30%(2)                         | 30%(2)                            | 30%(2)                            | 30%(2)                            |
| 0.3      | 38%(2)                         | 38%(2)                            | 38%(2)                            | 38%(2)                            |
| 0.5      | 40%(2)                         | 40%(2)                            | 40%(2)                            | 40%(2)                            |
| 1.0      | 58%(3)                         | 58%(3)                            | 58%(3)                            | 58%(3)                            |
| 1.5      | 66%(3)                         | 66%(3)                            | 66%(3)                            | 66%(3)                            |
| 2.0      | 84%(3)                         | 84%(3)                            | 84%(3)                            | 84%(3)                            |
| 2.5      | 88%(3)                         | 88%(3)                            | 88%(3)                            | 88%(3)                            |

---
