# Supplementary material for: Comparison of Criteria for Choosing the Number of Classes in Bayesian Finite Mixture Models
Source: PubMed Central journal article supplement (PMC5231325; doi:10.1371/journal.pone.0168838), 2017-01-12
Supplement: pone.0168838.s008.pdf [file pone.0168838.s008.pdf]

| $\alpha$    | Cut-off                           | $k = 1$ | $k = 2$ | $k = 3$ | $k = 4$ | $k = 5$ | $k = 6$ |
|-------------|-----------------------------------|---------|---------|---------|---------|---------|---------|
| 0.00001     | R&M <sub>0</sub> <sup>NI</sup>    | 100%(1) | 5%(1)   | 0%(2)   | 0%(2)   | 0%(3)   | 0%(3)   |
|             | R&M <sub>0.01</sub> <sup>NI</sup> | 100%(1) | 5%(1)   | 0%(2)   | 0%(2)   | 0%(3)   | 0%(3)   |
|             | R&M <sub>0.02</sub> <sup>NI</sup> | 100%(1) | 5%(1)   | 0%(2)   | 0%(2)   | 0%(3)   | 0%(3)   |
|             | R&M <sub>0.05</sub> <sup>NI</sup> | 100%(1) | 5%(1)   | 0%(2)   | 0%(2)   | 0%(3)   | 0%(3)   |
| 0.001       | R&M <sub>0</sub> <sup>NI</sup>    | 100%(1) | 5%(1)   | 0%(2)   | 0%(2)   | 0%(3)   | 0%(3)   |
|             | R&M <sub>0.01</sub> <sup>NI</sup> | 100%(1) | 5%(1)   | 0%(2)   | 0%(2)   | 0%(3)   | 0%(3)   |
|             | R&M <sub>0.02</sub> <sup>NI</sup> | 100%(1) | 5%(1)   | 0%(2)   | 0%(2)   | 0%(3)   | 0%(3)   |
|             | R&M <sub>0.05</sub> <sup>NI</sup> | 100%(1) | 5%(1)   | 0%(2)   | 0%(2)   | 0%(3)   | 0%(3)   |
| 0.01        | R&M <sub>0</sub> <sup>NI</sup>    | 100%(1) | 5%(1)   | 0%(2)   | 0%(2)   | 0%(3)   | 0%(3)   |
|             | R&M <sub>0.01</sub> <sup>NI</sup> | 100%(1) | 5%(1)   | 0%(2)   | 0%(2)   | 0%(3)   | 0%(3)   |
|             | R&M <sub>0.02</sub> <sup>NI</sup> | 100%(1) | 5%(1)   | 0%(2)   | 0%(2)   | 0%(3)   | 0%(3)   |
|             | R&M <sub>0.05</sub> <sup>NI</sup> | 100%(1) | 5%(1)   | 0%(2)   | 0%(2)   | 0%(3)   | 0%(3)   |
| 0.05        | R&M <sub>0</sub> <sup>NI</sup>    | 100%(1) | 5%(1)   | 0%(2)   | 0%(2)   | 0%(3)   | 0%(3)   |
|             | R&M <sub>0.01</sub> <sup>NI</sup> | 100%(1) | 5%(1)   | 0%(2)   | 0%(2)   | 0%(3)   | 0%(3)   |
|             | R&M <sub>0.02</sub> <sup>NI</sup> | 100%(1) | 5%(1)   | 0%(2)   | 0%(2)   | 0%(3)   | 0%(3)   |
|             | R&M <sub>0.05</sub> <sup>NI</sup> | 100%(1) | 5%(1)   | 0%(2)   | 0%(2)   | 0%(3)   | 0%(3)   |
| 0.1         | R&M <sub>0</sub> <sup>NI</sup>    | 100%(1) | 5%(1)   | 0%(2)   | 0%(2)   | 0%(3)   | 0%(3)   |
|             | R&M <sub>0.01</sub> <sup>NI</sup> | 100%(1) | 5%(1)   | 0%(2)   | 0%(2)   | 0%(3)   | 0%(3)   |
|             | R&M <sub>0.02</sub> <sup>NI</sup> | 100%(1) | 5%(1)   | 0%(2)   | 0%(2)   | 0%(3)   | 0%(3)   |
|             | R&M <sub>0.05</sub> <sup>NI</sup> | 100%(1) | 5%(1)   | 0%(2)   | 0%(2)   | 0%(3)   | 0%(3)   |
| 0.3         | R&M <sub>0</sub> <sup>NI</sup>    | 100%(1) | 40%(1)  | 5%(2)   | 0%(3)   | 0%(3)   | 0%(4)   |
|             | R&M <sub>0.01</sub> <sup>NI</sup> | 100%(1) | 35%(1)  | 5%(2)   | 0%(3)   | 0%(3)   | 0%(3)   |
|             | R&M <sub>0.02</sub> <sup>NI</sup> | 100%(1) | 35%(1)  | 5%(2)   | 0%(3)   | 0%(3)   | 0%(3)   |
|             | R&M <sub>0.05</sub> <sup>NI</sup> | 100%(1) | 35%(1)  | 5%(2)   | 0%(3)   | 0%(3)   | 0%(3)   |
| 0.5         | R&M <sub>0</sub> <sup>NI</sup>    | 90%(1)  | 55%(2)  | 25%(3)  | 5%(3)   | 0%(4)   | 0%(5)   |
|             | R&M <sub>0.01</sub> <sup>NI</sup> | 90%(1)  | 55%(2)  | 15%(3)  | 0%(3)   | 0%(3)   | 0%(4)   |
|             | R&M <sub>0.02</sub> <sup>NI</sup> | 100%(1) | 55%(2)  | 15%(3)  | 0%(3)   | 0%(3)   | 0%(4)   |
|             | R&M <sub>0.05</sub> <sup>NI</sup> | 100%(1) | 55%(2)  | 15%(3)  | 0%(3)   | 0%(3)   | 0%(4)   |
| 0.9         | R&M <sub>0</sub> <sup>NI</sup>    | 80%(1)  | 65%(2)  | 25%(4)  | 15%(5)  | 10%(6)  | 15%(7)  |
|             | R&M <sub>0.01</sub> <sup>NI</sup> | 95%(1)  | 95%(2)  | 95%(3)  | 95%(4)  | 95%(5)  | 95%(6)  |
|             | R&M <sub>0.02</sub> <sup>NI</sup> | 95%(1)  | 90%(2)  | 95%(3)  | 95%(4)  | 90%(5)  | 30%(5)  |
|             | R&M <sub>0.05</sub> <sup>NI</sup> | 100%(1) | 95%(2)  | 90%(3)  | 60%(4)  | 25%(4)  | 5%(5)   |
| frequentist | BIC                               | 100%(1) | 45%(1)  | 15%(2)  | 0%(3)   | 0%(3)   | 0%(3)   |
